# Supplementary material for: Return-to-work interventions for sick-listed employees with burnout: a systematic review
Source: HighWire-hosted journal article supplement (doi:10.1136/oemed-2023-108867), 2023-07-27
Supplement: oemed-2023-108867supp001_data_supplement.pdf [file oemed-2023-108867supp001_data_supplement.pdf]

## Supplementary material 1 – Search Strategy for Studies Included in the Systematic Review Involving Return-to-work Interventions for Employees with Burnout

### Databases

PubMed, Embase, Web of Science, Cochrane Central Register of Controlled Trials, Cinahl

### Language filter

English, French, Dutch

### Time filter

January 1, 2000 – December 31, 2022

### Spatial filter

None

### Search terms per database

#### *PubMed*

##### **Concept 1: Professional burnout**

"Burnout, Professional"[Mesh] OR burnout\*[tiab] OR burn-out\*[tiab] OR exhaustion-disorder\*[tiab] OR work-related-exhaustion[tiab] OR job-related-exhaustion[tiab]

##### **Concept 2: Sick leave or return to work**

"Sick Leave"[Mesh] OR sick-leave\*[tiab] OR medical-leave\*[tiab] OR disability-leave\*[tiab] OR sick-day\*[tiab] OR illness-day\*[tiab] OR "Absenteeism"[Mesh] OR absenteeism[tiab] OR disability-absence\*[tiab] OR sickness-absence\*[tiab] OR work-absence\*[tiab] OR workplace-absence\*[tiab] OR work-disabilit\*[tiab] OR work-incapa\*[tiab] OR absence-from-work[tiab] OR "Return to Work"[Mesh] OR return-to-work[tiab] OR back-to-work[tiab] OR work-resumption[tiab] OR job-resumption[tiab] OR reemploy\*[tiab] OR re-employ\*[tiab] OR job-reentr\*[tiab] OR job-re-entr\*[tiab] OR work-reentr\*[tiab] OR work-re-entr\*[tiab]

#### *Embase*

##### **Concept 1: professional burnout**

'burnout'/exp OR 'burnout\*':ti,ab,kw OR 'burn-out\*':ti,ab,kw OR 'exhaustion disorder\*':ti,ab,kw OR 'work related exhaustion':ti,ab,kw OR 'job related exhaustion':ti,ab,kw

##### **Concept 2: sick leave OR return to work**

'medical leave'/exp OR 'medical leave\*':ti,ab,kw OR 'sick leave\*':ti,ab,kw OR 'disability leave\*':ti,ab,kw OR 'sick day\*':ti,ab,kw OR 'illness day\*':ti,ab,kw OR 'absenteeism'/exp OR 'absenteeism':ti,ab,kw OR 'disability absence\*':ti,ab,kw OR 'sickness absence\*':ti,ab,kw OR 'work absence\*':ti,ab,kw OR 'workplace absence\*':ti,ab,kw OR 'work disability'/exp OR 'work disabilit\*':ti,ab,kw OR 'work incapa\*':ti,ab,kw OR 'absence from work':ti,ab,kw OR 'return to work'/exp OR 'return to work':ti,ab,kw OR 'back to work':ti,ab,kw OR 'work resumption'/exp OR 'work resumption':ti,ab,kw OR 'job resumption':ti,ab,kw OR 'reemploy\*':ti,ab,kw OR 're-employ\*':ti,ab,kw OR 'job reentr\*':ti,ab,kw OR 'job re-entr\*':ti,ab,kw OR 'work reentr\*':ti,ab,kw OR 'work re-entr\*':ti,ab,kw

*Web of Science***Concept 1: professional burnout**

burnout\* OR burn-out\* OR "exhaustion disorder\*" OR "work related exhaustion\*" OR "job related exhaustion\*\*"

**Concept 2: sick leave OR return to work**

"sick leave\*" OR "medical leave\*" OR "disability leave\*" OR "sick day\*" OR "illness day\*" OR absenteeism OR "disability absence\*" OR "sickness absence\*" OR "work absence\*" OR "workplace absence\*" OR "work disability\*" OR "work incapacity\*" OR "absence from work" OR "return to work" OR "back to work" OR "work resumption" OR "job resumption" OR reemploy\* OR re-employ\* OR "job reentr\*" OR "job re-entr\*" OR "work reentr\*" OR "work re-entr\*\*"

*Cochrane***Concept 1: professional burnout**

#1 : [mh "professional burnout"]

#2 : (burnout\* OR burn-out\* OR (exhaustion NEXT disorder\*) OR (work NEXT related NEXT exhaustion\*) OR (job NEXT related NEXT exhaustion\*)):ti,ab,kw

#3 : #1 OR #2

**Concept 2: sick leave OR return to work**

#4 : [mh "sick leave"] OR [mh "absenteeism"] OR [mh "return to work"]

#5 : ((sick NEXT leave\*) OR (medical NEXT leave\*) OR (disability NEXT leave\*) OR (sick NEXT day\*) OR (illness NEXT day\*) OR absenteeism OR (disability NEXT absence\*) OR (sickness NEXT absence\*) OR (work NEXT absence\*) OR (workplace NEXT absence\*) OR (work NEXT disability\*) OR (work NEXT incapacity\*) OR "absence from work" OR "return to work" OR "back to work" OR "work resumption" OR "job resumption" OR reemploy\* OR re-employ\* OR (job NEXT reentr\*) OR (job NEXT re-entr\*) OR (work NEXT reentr\*) OR (work NEXT re-entr\*)):ti,ab,kw

#6 : #4 OR #5

#7: #3 AND #6

*Cinahl***Concept 1: professional burnout**

(MH "Burnout, Professional") OR TI("burnout\*" OR "burn-out\*" OR "exhaustion disorder\*" OR "work related exhaustion\*" OR "job related exhaustion\*\*") OR AB("burnout\*" OR "burn-out\*" OR "exhaustion disorder\*" OR "work related exhaustion\*" OR "job related exhaustion\*\*")

**Concept 2: sick leave OR return to work**

(MH "Sick Leave") OR (MH "Absenteeism") OR (MH "Job Re-Entry")

OR TI("sick leave\*" OR "medical leave\*" OR "disability leave\*" OR "sick day\*" OR "illness day\*" OR "absenteeism" OR "disability absence\*" OR "sickness absence\*" OR "work absence\*" OR "workplace absence\*" OR "work disability\*" OR "work incapacity\*" OR "absence from work" OR "return to work" OR

"back to work" OR "work resumption" OR "job resumption" OR "reemploy\*" OR "re-employ\*" OR "job re-entr\*" OR "job reentr\*" OR "work reentr\*" OR "work re-entr\*")  
OR AB("sick leave\*" OR "medical leave\*" OR "disability leave\*" OR "sick day\*" OR "illness day\*" OR "absenteeism" OR "disability absence\*" OR "sickness absence\*" OR "work absence\*" OR "workplace absence\*" OR "work disability\*" OR "work incapa\*" OR "absence from work" OR "return to work" OR "back to work" OR "work resumption" OR "job resumption" OR "reemploy\*" OR "re-employ\*" OR "job re-entr\*" OR "job reentr\*" OR "work reentr\*" OR "work re-entr\*")
